# Supplementary material for: Stereotactic and Robotic Minimally Invasive Thermal Ablation of Malignant Liver Tumors: A Systematic Review and Meta-Analysis
Source: Front Oncol. 2021 Sep 23;11:713685. doi: 10.3389/fonc.2021.713685 (PMC8495244; doi:10.3389/fonc.2021.713685)
Supplement: Supplementary File 2 — All data extracted for systematic review and meta-analysis [file Table_2.xlsx]

## Sheet: Overall_Data
Stereotactic and robotic minimally invasive thermal ablation of malignant liver tumours - A systematic review and meta-analysis Pascale Tinguely, Iwan Paolucci, Simeon J. S. Ruiter, Stefan Weber, Koert P. de Jong, Daniel Candinas, Jacob Freedman, Jennie Engstrand
Accuracy	Efficency	Safety	Efficacy	Study No	Author	Year published	Years included	Lesion specification	Study design	Primary endpoint	Comparative study	Comparison group	Matching type	Tumor entity	Ablation technique	N patients	Age	N lesions	Lesion size [mm]	SD/range	Treatment access	Robotic guidance	Imaging technique	Tracking technology	Navigation device	Anesthesia, ventilation	Targeting accuracy Euclidean [mm]	Targeting accuracy lateral [mm]	Targeting accuracy angular [°]	Assessment of targeting accuracy	Analysis of factors associated with targeting accuracy	Statistically significant results	Type of analyses	Registration accuracy (FRE)	Targeting Length [mm]	Probe readjustment due to insufficient accuracy of ablation probe position	Exact definition	Technical/Targeting success	Definition targeting success	Probe repositioning due to insufficient tumor coverage after first ablation / N antenna insertions	Exact definition	Re-treatment after immediate scan	Overall procedure duration [min]	Exact definiton	Needle positioning time [min]	Exact definiton	Number of navigational CTs	Total DLP [mGy cm]	Complications overall
1	1	1	1	1	Tinguely_A	2020	15 to 17		R		0			HCC/metas	MWA	153		301	15	11 - 21	P	0	CT	Optical	CAS-ONE	General, Jet-Vent		3.5 ± 2.3 2.9 (0.2 - 14.1)	1.8 (1.1 – 2.7)	Targeting errors resulting after ablation probe positioning, defined as the deviance between the planned trajectory and the achieved ablation probe position, and was calculated as shown in Figure 2B	1	Cirrhosis Targeting trajectory length	Linear regression, GEE		111 (83 – 132)	4/301 lesions (1%)	Full retraction of ablation probe, repeat navigated alignment of aiming device and probe re-insertion	96% (290/301)	"Technical success": complete tumor coverage by the ablation zone as assessed on the final CT scan with intravenous contrast on the day of intervention, including immediate re-ablations (n = 48)	1 (77%) 2 19%) 3-5 (4%) 1.3 ± 0.6		48/301 lesions (16%)	70 ± 33 64 (46 - 82)	Time from first to last CT scan	8.7 ± 6 7 (4 - 13)	First switch to the navigation module until last screen shot taken of the positioned ablation probe		1912.8 ± 958.4 1732 (1202 - 2464)	10/191 (5%)
0	0	1	1	2	Schullian_A	2020	Jun 05 to Jun 18	CT-invisible lesions	R		1	SRFA without image fusion	Propensity score	HCC/metas	Unipolar RFA	60	HCC: 64.5 (45–77) Mets: 62.0 (7–78)	199	HCC: 29 Mets: 25	HCC: 5 - 110 Mets: 8 - 90	P	0	CT	Optical	Stealth Station Treon plus (Medtronic, USA)	General, tube disconnection												1	"Technical success": sufficiently accurate coaxial needle placement (deviation < 1 cm at all needle tips) according to predefined plans
0	1	1	1	3	Schaible	2020	Apr 14 to Nov 18		R	Primary efficacy	1	Manual guidance	None	HCC CCC Metas	MWA	Not reported		249	18.8	SD 10.8, 3 - 64	P	1	CT	Mechanical	MAXIO (Perfint Healthcare, India)	General, tube disconnection														92/249 lesions (37%)	"If there was suspicion of insufficient ablation margin repositioning was performed"								26/88 (29.6%)
0	0	1	1	4	Schullian_B	2020	Jan 06 to Jun 18	HCC with previous resection	R		0			HCC	Unipolar RFA	34	67.0 (31 - 81)	140	30	5 - 100	P	0	CT	Optical	Stealth Station Treon plus (Medtronic, USA)	General, tube disconnection												1	"Technical success": accurate electrode placement according to protocol with immediate, complete coverage by the ablation zone
0	0	1	1	5	Schullian_C	2020	Jan 05 to Jun 18	Very large > 8 cm tumors	R		0			HCC CCC Metas	Unipolar RFA	34	66 (27–81)	41	90	80 - 180	P	0	CT	Optical	Stealth Station Treon plus (Medtronic, USA)	General, tube disconnection												1	"Technical success": accurate electrode placement, with a deviation <1 cm at the needle tip, according to predefined plan
0	1	1	1	6	Schullian_D	2020	05 to 18	Multiple ≥ 4 tumors	R		0			HCC Metas	Unipolar RFA	92	61 (25–81)	549	2.7	0.5 - 13	P	0	CT	Optical	Stealth Station Treon plus (Medtronic, USA)	General, tube disconnection												1	"Technical success": deviation < 1 cm at the needle tip (according to predefined plans)				254.5 ± 112 (calculated) 240 (75 - 463)	Interval between planning CT and final control CT
1	1	1	1	7	Volpi	2019	Jun 17 to Jan 18	US-undetectable / difficult-to-access	R		0			HCC Metas	RFA/MWA	21	67 (47-84)	27	12	SD 5.7	P	0	CT	EM	IMACTIS (Imactis, France)	General, Jet-Vent	22 ± 19			"first-pass control = aiming at approx. 1 cm from the tumor" -> not used for final ablation!					111 ± 31	1/21 patients (4.8%)	withdrawing the probe for repositioning	0.96	"Approx. 1 cm from the tumor", first-pass control	4 pat (15%) 1.14 ± 0.35	Re-adjustments for second overlapping ablation Mean number of applications per lesion	4 lesions (15%)	58.3 ± 24.5 (calculated) 51 (23 - 108)	Not further defined	23 ± 12	From planning to the last pre-ablation CT acquisition	3.2 ± 1.3	2180 ± 1054	2/27 (7%)
0	0	1	1	8	Schullian_E	2019	06 to 18	Octogenarians	R		1	< 80 years old	Propensity score	HCC CCC Metas	Unipolar RFA	36	81.5 (80 - 88) (deliberate)	70	27	15 - 90	P	0	CT	Optical	Stealth Station Treon plus (Medtronic, USA)	General, tube disconnection												1	Sufficient targeting accuracy, "according to predifined plan"
0	0	1	1	9	Schullian_F	2019	05 to 17	Caudate HCC	R		0			HCC	Unipolar RFA	20	58 (31 - 79)	24	15	10 - 80	P	0	CT	Optical	Stealth Station Treon plus (Medtronic, USA)	General, tube disconnection												1	Not defined
0	0	1	1	10	Perrodin	2019	15 to 17		R		0			Non-CRLM metas	MWA	23	58.4 (7 - 79)	40	13.5	6 - 39	P	0	CT	Optical	CAS-ONE (CAScination AG, Switzerland)	General, Jet-Vent												97.5%	Incomplete ablation immediate CT scan										3/25 (12%)
0	0	1	1	11	Schullian_G	2019	06 to 18	Hepatic dome tumors	R		1	Non-dome lesions	Propensity score	HCC CCC Metas	Unipolar RFA	177	65 (7 - 87)	238	22	5 - 100	P	0	CT	Optical	Stealth Station Treon plus (Medtronic, USA)	General, tube discon												1	Sufficient targeting accuracy (deviation < 1 cm at the needle tip), "according to predifined plan"
0	0	1	1	12	Schullian_H	2019	03 to 18	Subcardiac HCC	R		1	Non- subcardiac lesions	Propensity score	HCC	MWA	79	65.5 (45 - 85)	114	25	5 - 95	P	0	CT	Optical	Stealth Station Treon plus (Medtronic, USA)	General, tube discon												1	Accurate electrode placement according to protocol with immediate, complete coverage by the ablation zone
0	1	1	1	13	Zhang_A	2019	Aug 16 to Jan 18	Solitary nodule <5cm	RCT	Not defined	1	Conventional CT guidance		HCC CRLM	RFA/MWA	20	52.5 (45-71)	20	24	SD 11, 7 - 46	P	0	CT	EM	IG4 (Veran Medical Technologies Inc, USA)	Local, sedation										2.4 +/- 1.2	Withdrawal of the electrode, position correction and new puncture	1	Treatment according to the protocol and complete coverage by the ablation zone	1.2 ± 0.4	Not defined				16.5 ± 10.6	From the first CT scan of the patient until the ablation electrode reached the target tumor	7.1 ± 1.7	807 ± 285
1	1	1	1	14	Lachenmayer	2019	15 to 17		R		0			HCC	MWA	88	66 (46 - 84)	174	16	4 - 45	P	0	CT	Optical	CAS-ONE (CAScination AG, Switzerland)	General, Jet-Vent		3.8 ± 2.4 3.2 (0.2 - 14.1)										0.96	The control of the ablation zone revealed an insufficient margin for 26 lesions immediately post-ablation, 19 of which could be immediately re-ablated			19 lesions (11%)	36.3 ± 18.9 36 (3.6 - 88)	Not further defined	9 ± 6.4 7.1 (0.6 - 25.2)	First switch to the navigation module until last screen shot taken of the positioned ablation probe		2023,3 ± 912,0 1896 (571 - 4748)	7/119 (5.9%)
1	1	1	1	15	Heerink	2019	Feb 17 to Nov 17	Tumor size < 5, number < 3	RCT	N antenna repositionings	1	Freehand antenna placement		CRLM HCC Benign	MWA	18	60.1 ± 15.2	21	21.2	SD 10.2	P	1	CT	Mechanical	Needle Positioning System (DEMCON Advanced Mechatronics, Netherlands)	General, tube discon	10.2 ± 5.2	6.4 ± 4.2	4.5 ± 3.2	"Adequate" placement: position within the tumor (except if close to liver capsule). CAVE: not clear how many in stereotactic group were manually repositioned -> not used for final ablation					92.9 ± 31.8	0/21 lesions (4.8%)	N antenna repositionings to reach a position inside the tumor						160 ± 26	Time from the patient’s arrival in the CT room to the time of the patient’s departure	36.3 ± 19.3 (calculated) 36 (3 - 70)	Time from target selection until adequate antenna position	5	876 (242 - 3539)	1/18 (5.6%)
1	1	1	1	16	Beyer_A	2018	Apr 16 to Apr 18		P cohort study	Procedure time, targeting accuracy, radiation doses	1	Conventional MWA	Matched pairs (tumor size, segment, entity)	HCC CRLM	MWA	18	63.7 ± 11.6	18	20.6	SD 9.0	P	0	CT	Optical	CAS-ONE (CAScination AG, Switzerland)	General, tube discon	3.7 ± 1.2	2.8 ± 1.3	2.7 ± 1.5	Euclidean distance between the planned trajectory and actual antenna position						1/18 patients (5.6%)	Antenna repositioned until active feed point of MWA antenna determined to be in the tumor center						21.8 ± 6.3	Time from the first CT scan to the verification scan with the final antenna position	3.7 ± 2.5	Not further defined		2115 ± 276	0/18
0	1	1	1	17	Zhang_B	2018	Apr 13 to Oct 15	Single nodule, 3-8cm	R	Safety, efficiency of multiple antenna placements for large HCC	1	Manual guidance (US)	None	HCC	MWA	19	61.3 ± 9.9	19	41.4	SD 9.5	P	0	CT/US	EM	Fusion image navigation system (FINS) (self developed)	General								When Root Mean Square (RMS) smaller than 10, image registration considered to be complete				94.7%	Complete ablation of macroscopic tumor proved by CEUS within 3 days	3.7 ± 1.6	"Sum of the number of each antenna insertion at the end of the session"				5.1 ± 0.8	Total time needed for the operation minus the time of ablation, divided by the number of antenna insertions			Text: 57.9% Table 3: 14/19 (73.9%)
0	0	1	1	18	Bale_A	2017	Dez 05 to Jul 16		R		0			BeastCa Metas	Unipolar RFA	26	54.4 ± 12.8	64	2.8	SD 2.1	P	0	CT	Optical	Stealth Station Treon plus (Medtronic, USA)	General, tube discon
0	1	1	1	19	Tinguely_B	2017	Jan 13 to Oct 15		R		0			HCC Metas	MWA	51	63.3 ± 9.3	346	16.7	SD 9.8 4.9 - 56.5	L	0	Preoperative CT	Optical	CAS-ONE (CAScination AG, Switzerland)	General, tube discon								8.1 +/- 2.8				1	Ablation during surgery				102 ± 64	Not further defined (surgery time included)					15/54 (28%)
0	0	1	1	20	Hirooka	2017	May 14 to Oct 14	Solitary HCC, <5 cm in diameter	P cohort study	Relapse-free survival, deformity of ablation volume	1	Free-hand ablation	None	HCC	Bipolar RFA	27	71.6 ± 9.1	27	23.9	SD 9.1 6 - 40	P	0	CT/US	EM	3D sim-Navigator (Hitachi Healthcare, Japan)	General												Not reported	Necrotic area of the target nodule and surrounding liver parenchyma was depicted as an area of hypoattenuation CT after 2-3 days	1 (3.7%)	If width of ablation area not satisfactory, applicator repositioned in another position, again outside the tumor. After re-insertion, additional ablation performed	1 (3.7%)
1	1	1	0	21	Engstrand	2016	Mar 13 to Jan 14	Not visible on US, max 2 lesions, <30mm	R		0			HCC Metas	MWA	17	69.6 ± 9.2	25	14.9	SD 5.9	P	0	CT	Optical	CAS-ONE (CAScination AG, Switzerland)	General, Jet-Vent	5.8 ± 3.2	4.0 ± 2.5	2.7 ± 2.9						87.5 ± 27.3	1/25 lesions (4%)	Number of needle readjustments						57.9 ± 25.2 59 (26 - 126)	Time from acquisition of the first planning scan to withdrawal of the antenna				958 ± 557	2/25 (8%)
0	0	1	1	22	Bale_B	2016	Jan 05 to Dec 13	< 5cm	R		0			Melanoma Metas	Unipolar RFA	20	60 (42 - 76)	75	17	5 - 145	P	0	CT	Optical	Stealth Station Treon plus (Medtronic, USA)
1	1	1	1	23	Beyer_B	2015	Jun 14 to Feb 15		R		1	Manual guidance	None	HCC Metas	MWA	Not reported		34	19.1	SD 9.0	P	1	CT	Mechanical	MAXIO (Perfint Healthcare, India)	General, apnea (?)	3.1 ± 2.5 (after manual adaption: 1.6 ± 1.3)			Cartesian (=Euclidean) distance (active center to tumor center)						14/34 lesions (41.2%)	Manual position correction after robotic needle placement						18.3 ± 2.0	From the preinterventional planning multi-slice CT to the beginning of the ablation				2216 ± 1057	0/34
0	1	1	1	24	Abdullah_A	2015	Aug 13 to Feb 14		R		1	For radiation doses: cohort of pat targeted free-hand	None	HCC Metas	RFA/MWA	20	59	40	23	6 - 49	P	1	CT	Mechanical	MAXIO (Perfint Healthcare, India)	General, tube discon										12/20 patients (60%) Mean n: 0.8 ± 0.8 (0 - 3)	Not defined	1	"Successfully completed": not defined	2.0 ± 1.3 (1-5)	Not defined							1382 ± 536	0/20
1	1	1	0	25	Mbaliske	2014	Jun 13 to Dec 13	Single nodule, TACE within 3 month prior to ablation	P cohort study	Not defined	1	Manual guidance	None	HCC CCC Metas	MWA	30	57.7 ± 15 (33 – 83)	30	23.2	SD 8.4, 11 – 46	P	1	CT	Mechanical	MAXIO (Perfint Healthcare, India)	Local, sedation	Initial attempt: 5.3 ± 1.8, After re-adjustment: 1.9 ± 1.7								115 ± 33.7 (80 - 135)	1.13 ± 0.7 (0 - 3)	Not defined			2.1 ± 0.73 (1–3)	N of insertions (NOI) performed with the applicator after each thermoablation procedure		25.2 ± 2.8	Including planning time, preparation time (insertion time and ablation time)	1.5 ± 0.57	Time duration for an accurate insertion of the applicator into the target tumour		193.8 ± 93 (148 - 251)	0/30
0	1	1	1	26	Sindram	2014			P case series		0			HCC Metas	MWA	13	59.4 ± 11.1	34	18.0	SD 9.2 5 - 40	L	0	US	EM	AIM Guidance System (InnerOptic Technology Inc., USA)	General										3/34 lesions (8.8%)	93% first-attempt passes = hit the target						91.9 ± 37.4 (46 - 177)	Not further defined (surgery time presumably included)					3/13 (23%)
0	1	1	1	27	Schullian_I	2014	Jan 05 to Mar 10	Prior laparoscopic liver packing	R		0			HCC CCC Metas	Unipolar RFA	47	64, 34 – 83	120	24	1 - 150	P	0	CT	Optical	Stealth Station Treon plus (Medtronic, USA)	General, tube discon																	129 ± 87.8 (calculated) 90 (16 - 320)	Median ablation time (without laparoscopic packing)
1	0	1	1	28	Mauri	2014	Dec 02 - Dec 12	Undetectable with unenhanced US and either totally or incompletely conspicuous on CEUS	R		0			HCC Metas	RFA/MWA	175	66 ± 12.3	295	13	SD 6 5 - 25	P	0	US-CT US-MRI	EM	VirtuTrax (CIVCO Medical Solutions, USA)	General, tube discon/end-exp	95.6%			"Correct targeting" as assessed on 24h CT/MRI: "Center of the ablated zone located within 5-mm range from the ideal target point preoperatively established"	1	None	Univariate between-group analyses					90.2%	At 24h CT/MRI: Nonenhancing necrotic volume covered the whole tumor and a margin of at least 5 mm										11/215 (5.1%)
0	1	1	1	29	Abdullah_B	2013			R		0			HCC CRLM	RFA	11	63.2	17	21.8	SD 5.4 11 - 30	P	1	CT	Mechanical	ROBIO EX (Perfint Healthcare, India)	General, tube discon										6/17 patients (35%) Mean 0.67 (0 - 2)	Not defined	1	Complete ablatio on multiphasic CE-CT immediately after ablation	Mean 1.5 (1 - 4)	Not defined							956.09 ± 400.33	0/11
0	0	1	1	30	Bale_C	2011	05 to 11		R		0			CRLM	Unipolar RFA	63	66 (33 - 85)	189	20	5 - 130	P	0	CT	Optical	Stealth Station Treon plus (Medtronic, USA)	General, tube disconnection
0	0	1	1	31	Haidu	2011	Dec 04 to Jun 10	Inoperable ICC	R		0			ICC	Unipolar or multipolar RFA	11	61 ( 39–80)	36	3	5 - 100	P	0	CT	Optical	Stealth Station Treon plus (Medtronic, USA)	General, tube disconnection
0	0	1	1	32	Widmann_A	2011	Jan 08 to Jan 10	Lesions close to hollow viscera: prior laparoscopic packing	R		0			HCC CCC Metas	Unipolar RFA	90	61.1, 22–85	177	29	5 - 110	P	0	CT	Optical	Stealth Station Treon plus (Medtronic, USA)	General, tube disconnection																							31/106 (29.3%)
1	0	1	0	33	Widmann_B	2011	Jul 08 to Apr 09		P case series		0			Not specified	RFA	20		35	31	10 - 80	P	0	CT	Optical	Stealth Station Treon plus (Medtronic, USA)	General, tube disconnection		3.6 ± 2.5 (0.0 – 14 mm)	1.3 ± 1.2 (0.0 – 7.9)	Distance between the tip of the plan to the tip of the coaxial needle	1	Lateral error at needle tip: Seg II vs Seg Ivb location "Clear parenchymal " vs "subphrenic plus fat"	Univariate between-group analyses	Root Mean Square (RMS) < 1mm -> onlr then accepted															0/20
0	1	1	1	34	Liu	2011	Oct 09 to Sept 10	Undetectable on US but detectable by iv contrast CT or MRI, ≤ 3 nodules	P case series		0			HCC	MWA	18	59.3 ± 9.9 (42 - 75)	18	18.5	SD 7.7 9 - 38	P	0	US-CT US-MRI	EM	MyLab90 System equipped with Virtual Navigator, (Esaote SpA, Italy)	Local, sedation								Less than 5 mm, the fusion image was considered successful						1.28 ± 0.46	Antenna placements for each tumor until this tumor was ablated completely
[truncated: 42 more columns]
